# Supplementary material
Source: MDPI journal article supplement (https://www.mdpi.com/2071-1050/13/16/9353)
Supplement: s1 [file s1]

6706 kn Hollandseweg 1 Wageningen | The Netherlands

To whom it may concern

The following project proposal has been reviewed by the Social Sciences Ethics Committee (SEC):

Title: Socio-Ecological game experiment with farmers on Banana  
Xanthomonas Wilt disease management  
Project team: Mariette McCampbell, Julisse Galarza Villamar  
Funding: CGIAR RTB programme flagship 5.4  
Period: March-April 2020  
Location: Rwanda

The Committee has concluded that the proposal deals with ethical issues in a satisfactory way and that it complies with the Netherlands Code of Conduct for Research Integrity.

With kind regards,

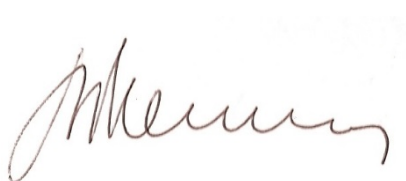

Professor Dr Marcel Verweij  
Chair Social Sciences Ethics Committee

DATE  
01-04-2020

SUBJECT  
Ethical approval of research  
project

POSTAL ADDRESS  
6706 kn Hollandseweg 1  
Wageningen  
The Netherlands

VISITORS' ADDRESS  
Building 201

INTERNET  
[www.wur.nl/university](http://www.wur.nl/university)

CoC NUMBER  
09215846

HANDLED BY  
Prof. Dr Marcel Verweij

TELEPHONE  
+31(0)317484334

EMAIL  
[esther.roquas@wur.nl](mailto:esther.roquas@wur.nl)
